# Supplementary material for: Immune response effects of diverse vaccine antigen attachment ways based on the self-made nanoemulsion adjuvant in systemic MRSA infection
Source: PubMed Central journal article supplement (PMC9078882; doi:10.1039/c8ra00154e), 2018-03-14
Supplement: RA-008-C8RA00154E-s001.pdf [file RA-008-C8RA00154E-s001.pdf]

## Supplementary Information

### **The immune response effect of diverse vaccine antigen attachment ways based on the self-made nanoemulsion adjuvant in the systemic MRSA infection**

Liu-yang Yang, Chao Wei, Yun Yang, Ya-nan Tong, Sha Yang, Liu-sheng Peng, Qian-fei Zuo, Yuan Zhuang, Ping Cheng, Hao Zeng, Quan-ming Zou, Hong-wu Sun<sup>#</sup>

(National Engineering Research Center of Immunological Products & Department of Microbiology and Biochemical Pharmacy, College of Pharmacy, Third Military Medical University of Chinese PLA, Chongqing 400038, PR China)

\*These authors contributed equally to this work.

**#Correspondence:** Hongwu Sun

National engineering research center for immunological products & Department of microbiology and biochemical pharmacy, College of pharmacy, Third military medical university of Chinese PLA, 30 Sha Ping Ba Gaotanyan Street, Chongqing, 400038, China.

**Tel:** +86-023-68752377;

**Fax:** +86-023-68752377.

Email: sunhongwu2001@163.com

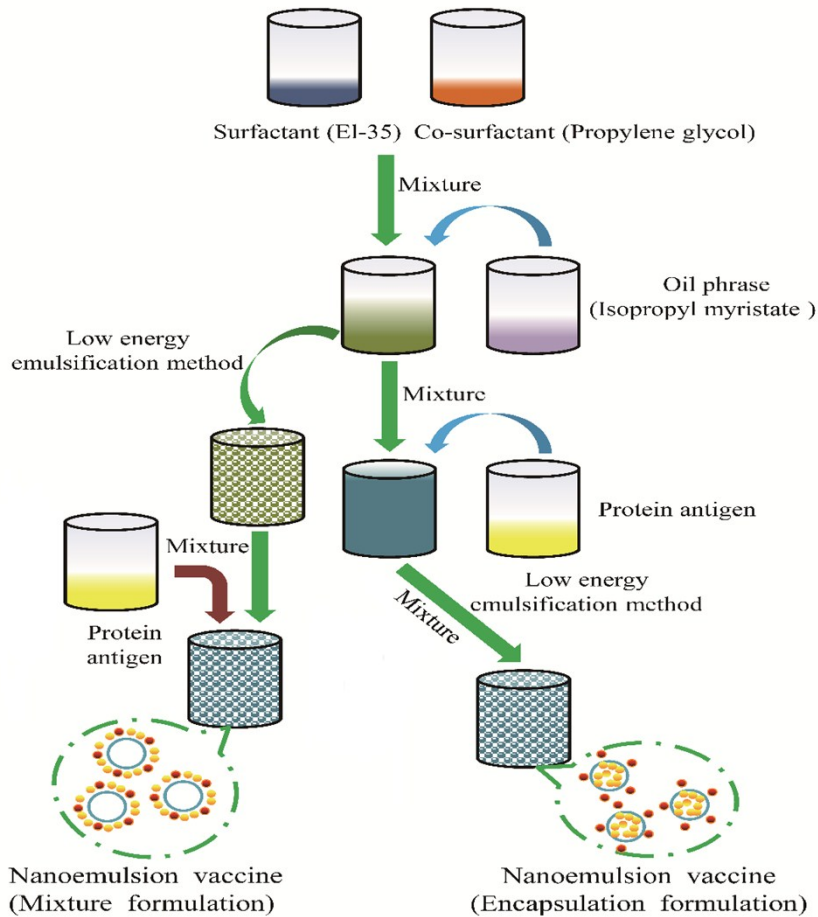

**Figure S1. Schematic illustration of three different vaccine antigen attachment ways by the low energy emulsification methods.**

The encapsulated formulation with 200 $\mu$ g/mL of the recombination antigen protein Hla<sub>H35L</sub>IsdB<sub>348-465</sub> was prepared. The mixture attachment way was stirred for 2h at 16 $^{\circ}$ C after adding the same concentration of Hla<sub>H35L</sub>IsdB<sub>348-465</sub> and the BNE. The combination attachment way was stirred for 2h at 16  $^{\circ}$ C after adding half volume encapsulation and half volume mixture way of nanoemulsion vaccine.

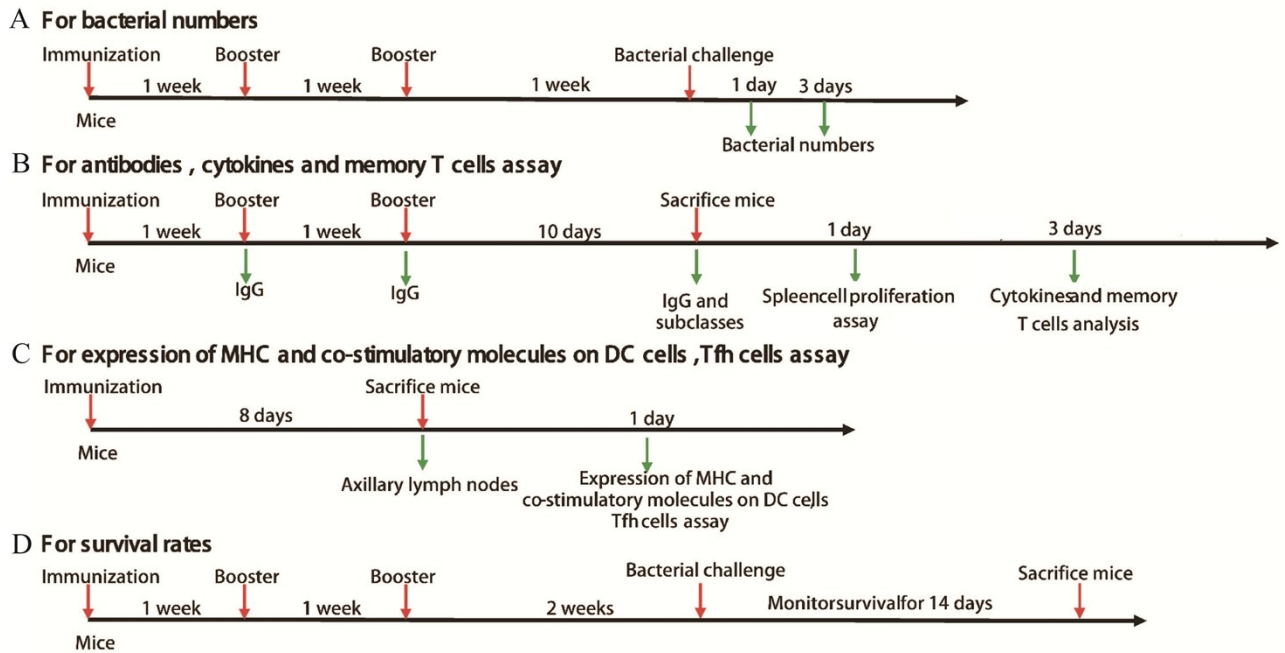

**Figure S2. The animal experiment scheme.**

Female blab/c mice (6–8 weeks old) were immunized by intramuscular injection into the upper quadriceps muscles three times on day 0, 7 and 14. (A) Bacterial burdens in organs were performed on 1 and 3 days post infection. (B) Antibody responses, spleen cell proliferation assay and memory T cell assay were performed on days 24, 25 and 27. (C) The expression of MHC and co-stimulatory molecules on DC cells and Tfh cells in draining lymph nodes were performed on 8 days after immunization. (D) Survival rates were performed on day 28 and monitored for 14 days.

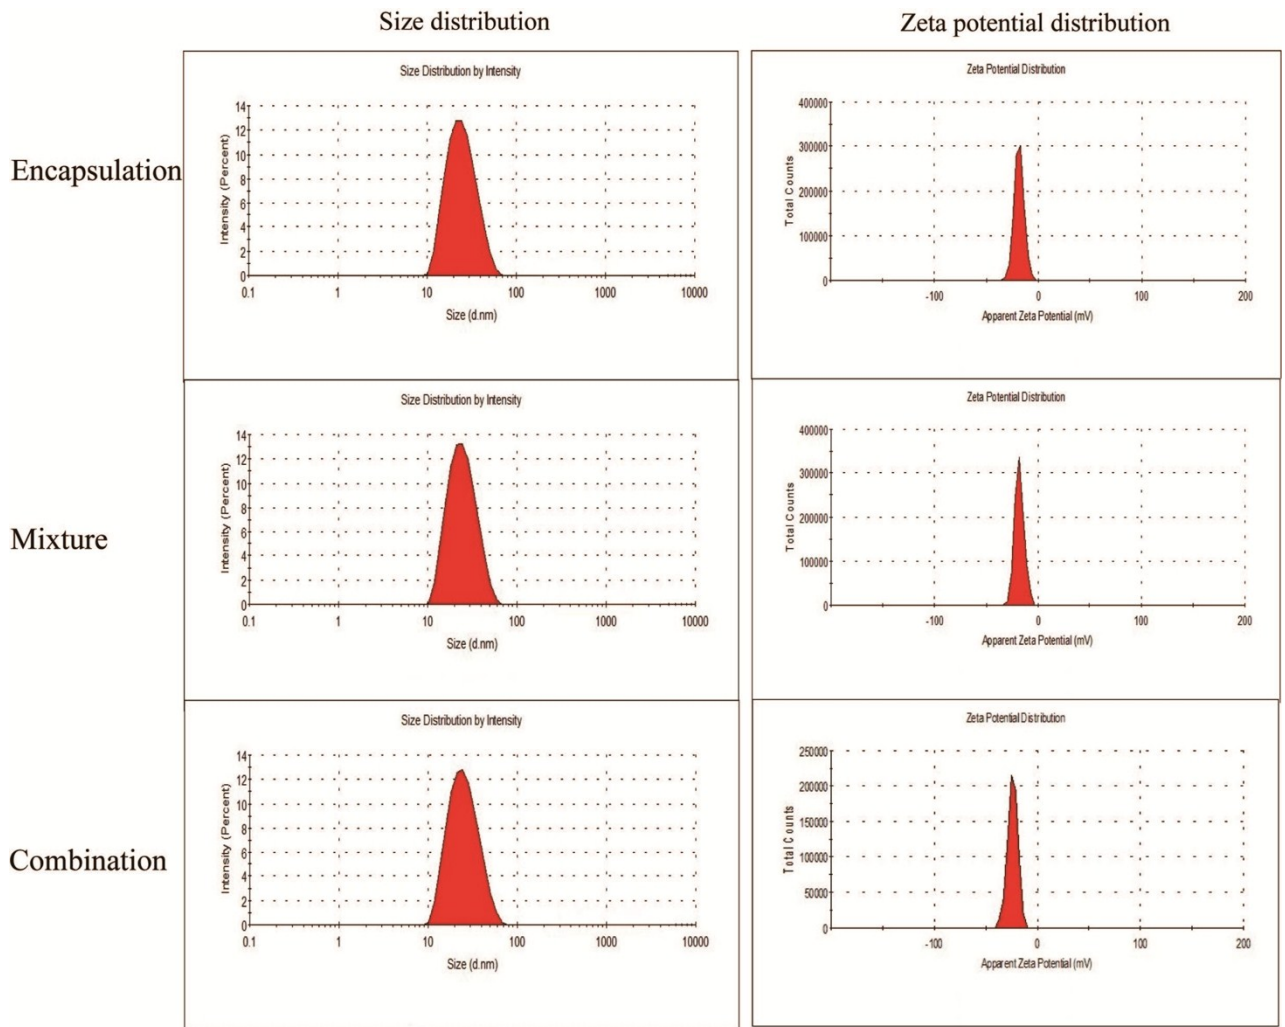

**Figure S3. Size distribution and zeta potential distribution of three different nanoemulsion adjuvant vaccine (encapsulation, mixture and combination).**

The size distribution and zeta potential distribution of encapsulation, mixture and combination attachment ways.

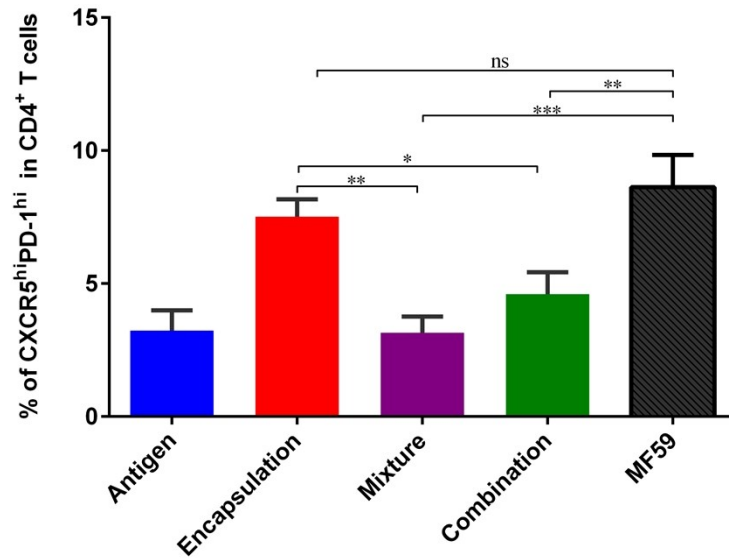

**Figure S4. The frequency of follicular helper CD4<sup>+</sup> T cells in the draining lymph nodes of immunized mice.**

The popliteal lymph nodes of balb/c mice (n = 6) were isolated. The frequency of follicular helper CD4<sup>+</sup> T cells (CD4<sup>+</sup>CXCR5<sup>hi</sup>PD-1<sup>hi</sup>) was determined by flow cytometry.

Data are expressed as the mean  $\pm$  SD (n = 6).
